# Supplementary material for: Oral administration of cysteine peptides attenuates UV-B-induced skin erythema and pigmentation in humans
Source: PubMed Central journal article supplement (PMC11436644; doi:10.1038/s41598-024-73447-z), 2024-09-27
Supplement: 41598_2024_73447_MOESM1_ESM.pdf [file 41598_2024_73447_MOESM1_ESM.pdf]

**Table S1.** Baseline characteristics of analyzed participants (\*,  $p < 0.05$ ; \*\*,  $p < 0.01$ ; \*\*\*,  $p < 0.001$ )

|                                                             | Placebo (n = 43) | Cysteine peptides (n = 45) | <i>p</i> value |
|-------------------------------------------------------------|------------------|----------------------------|----------------|
| Age (mean±SD)                                               | 47.5±5.8         | 47.5±7.8                   | 0.987          |
| Female, n (%)                                               | 27 (63%)         | 27 (60%)                   | 0.791          |
| Skin photo types (II, III)                                  | 2.3±0.4          | 2.3±0.5                    | 0.731          |
| MED (mJ/cm <sup>2</sup> ) (mean±SD)                         | 33.8±4.2         | 33.9±4.8                   | 0.566          |
| L*value (mean±SD)<br>7days after 1.5MED irradiation         | 60.8±2.7         | 61.3±2.4                   | 0.32           |
| Melanin indices (mean±SD)<br>7days after 1.5MED irradiation | 152.3±46.6       | 148.6±39.7                 | 0.686          |

**Table S2.** Vital signs and physical measurements at pre- and post-intake (\*,  $p < 0.05$ )

|                                 | Measurement point | Group             | Number of cases | Average $\pm$ SD | $p$ value      |                |
|---------------------------------|-------------------|-------------------|-----------------|------------------|----------------|----------------|
|                                 |                   |                   |                 |                  | Between groups | Within a group |
| Systolic blood pressure (mmHg)  | Pre-intake        | Cysteine peptides | 45              | 125.4 $\pm$ 12.6 | 0.769          | -              |
|                                 |                   | Placebo           | 45              | 126.2 $\pm$ 12.5 |                | -              |
|                                 | Post-intake       | Cysteine peptides | 45              | 126.6 $\pm$ 11.9 | 0.267          | 0.313          |
|                                 |                   | Placebo           | 43              | 123.7 $\pm$ 12.7 |                | 0.068          |
| Diastolic blood pressure (mmHg) | Pre-intake        | Cysteine peptides | 45              | 81.4 $\pm$ 9.0   | 0.875          | -              |
|                                 |                   | Placebo           | 45              | 81.1 $\pm$ 9.8   |                | -              |
|                                 | Post-intake       | Cysteine peptides | 45              | 81.8 $\pm$ 8.1   | 0.422          | 0.632          |
|                                 |                   | Placebo           | 43              | 80.3 $\pm$ 9.3   |                | 0.393          |
| Pulse (bpm)                     | Pre-intake        | Cysteine peptides | 45              | 72.8 $\pm$ 9.5   | 0.313          | -              |
|                                 |                   | Placebo           | 45              | 74.8 $\pm$ 9.5   |                | -              |
|                                 | Post-intake       | Cysteine peptides | 45              | 70.8 $\pm$ 9.3   | 0.718          | 0.076          |
|                                 |                   | Placebo           | 43              | 71.5 $\pm$ 9.8   |                | * 0.010        |
| Body weight (kg)                | Pre-intake        | Cysteine peptides | 45              | 61.6 $\pm$ 11.2  | 0.292          | -              |
|                                 |                   | Placebo           | 45              | 59.2 $\pm$ 10.3  |                | -              |
|                                 | Post-intake       | Cysteine peptides | 45              | 61.5 $\pm$ 11.2  | 0.353          | 0.521          |
|                                 |                   | Placebo           | 43              | 59.3 $\pm$ 10.5  |                | 0.856          |
| BMI (kg/m <sup>2</sup> )        | Pre-intake        | Cysteine peptides | 45              | 22.5 $\pm$ 3.0   | 0.812          | -              |
|                                 |                   | Placebo           | 45              | 22.4 $\pm$ 3.1   |                | -              |
|                                 | Post-intake       | Cysteine peptides | 45              | 22.5 $\pm$ 3.0   | 0.773          | 0.620          |
|                                 |                   | Placebo           | 43              | 22.3 $\pm$ 3.0   |                | 0.916          |

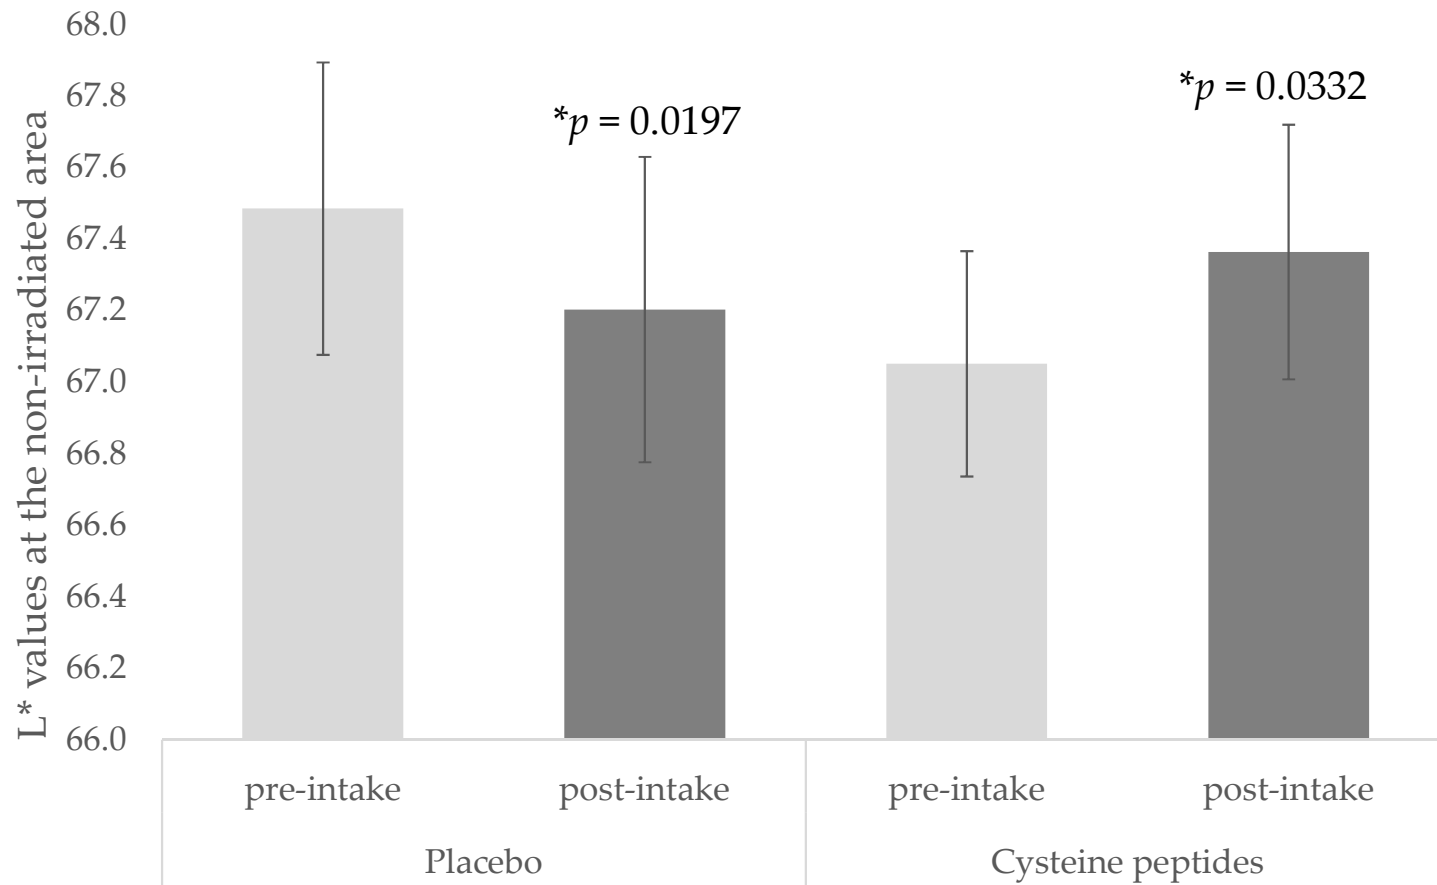

**Figure S1.** Changes in L\* values at the non-irradiated area over 5 weeks were significantly different in both groups, but in the opposite manner. The change in L\* value in the cysteine peptides group significantly increased ( $*p = 0.0332$  by Student's paired t-test), indicating that the skin became brighter after 5 weeks of cysteine peptides intake. The L\* value in the placebo group significantly decreased ( $*p = 0.0197$  by Student's paired t-test), indicating that the skin became darker after 5 weeks of placebo intake.

\*,  $p < 0.05$ ; \*\*,  $p < 0.01$ ; \*\*\*,  $p < 0.001$  by unpaired t- test. Error bars indicate the standard errors.

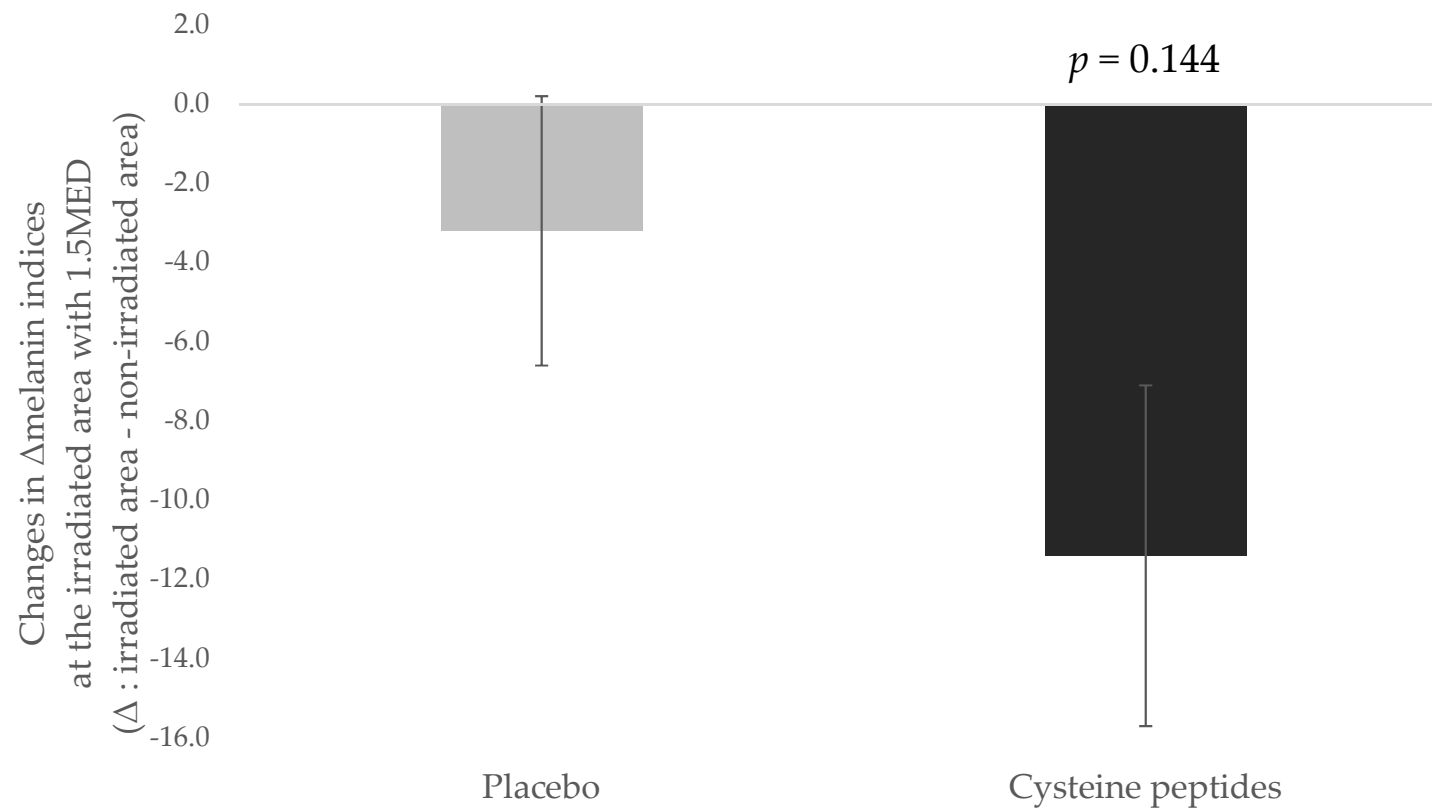

**Figure S2.** Five-week oral supplementation of cysteine peptides suppressed the pigmentation at the UV-B irradiated area, however, the changes in  $\Delta$ melanin indices was not significantly different between the groups. Changes from baseline in  $\Delta$ melanin index at 7 days after irradiation with 1.5MED in the placebo group (gray) and cysteine peptides group (black) were indicated.  $\Delta$ melanin index was calculated by the difference between irradiated area and non-irradiated area. \*,  $p < 0.05$ ; \*\*,  $p < 0.01$ ; \*\*\*,  $p < 0.001$  by unpaired t- test. Error bars indicate the standard errors.

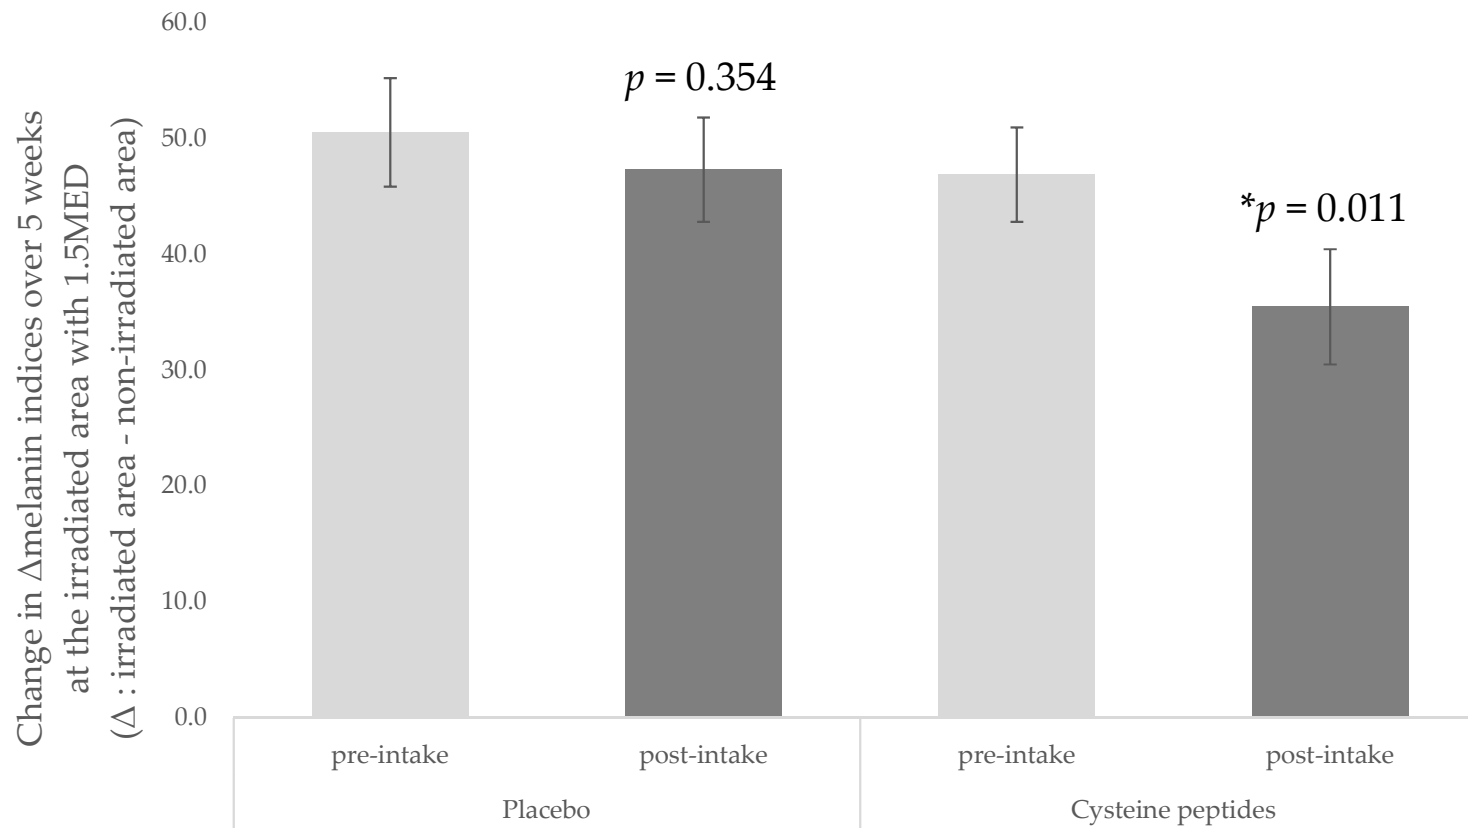

**Figure S3.** The  $\Delta$ melanin indices at irradiated area with 1.5MED significantly decreased after 5 weeks of intervention in the cysteine peptides group (\* $p = 0.011$  by Student's paired t-test), compared to the baseline, whereas that of placebo did not significantly changed.

\*,  $p < 0.05$ ; \*\*,  $p < 0.01$ ; \*\*\*,  $p < 0.001$  by unpaired t- test. Error bars indicate the standard errors.

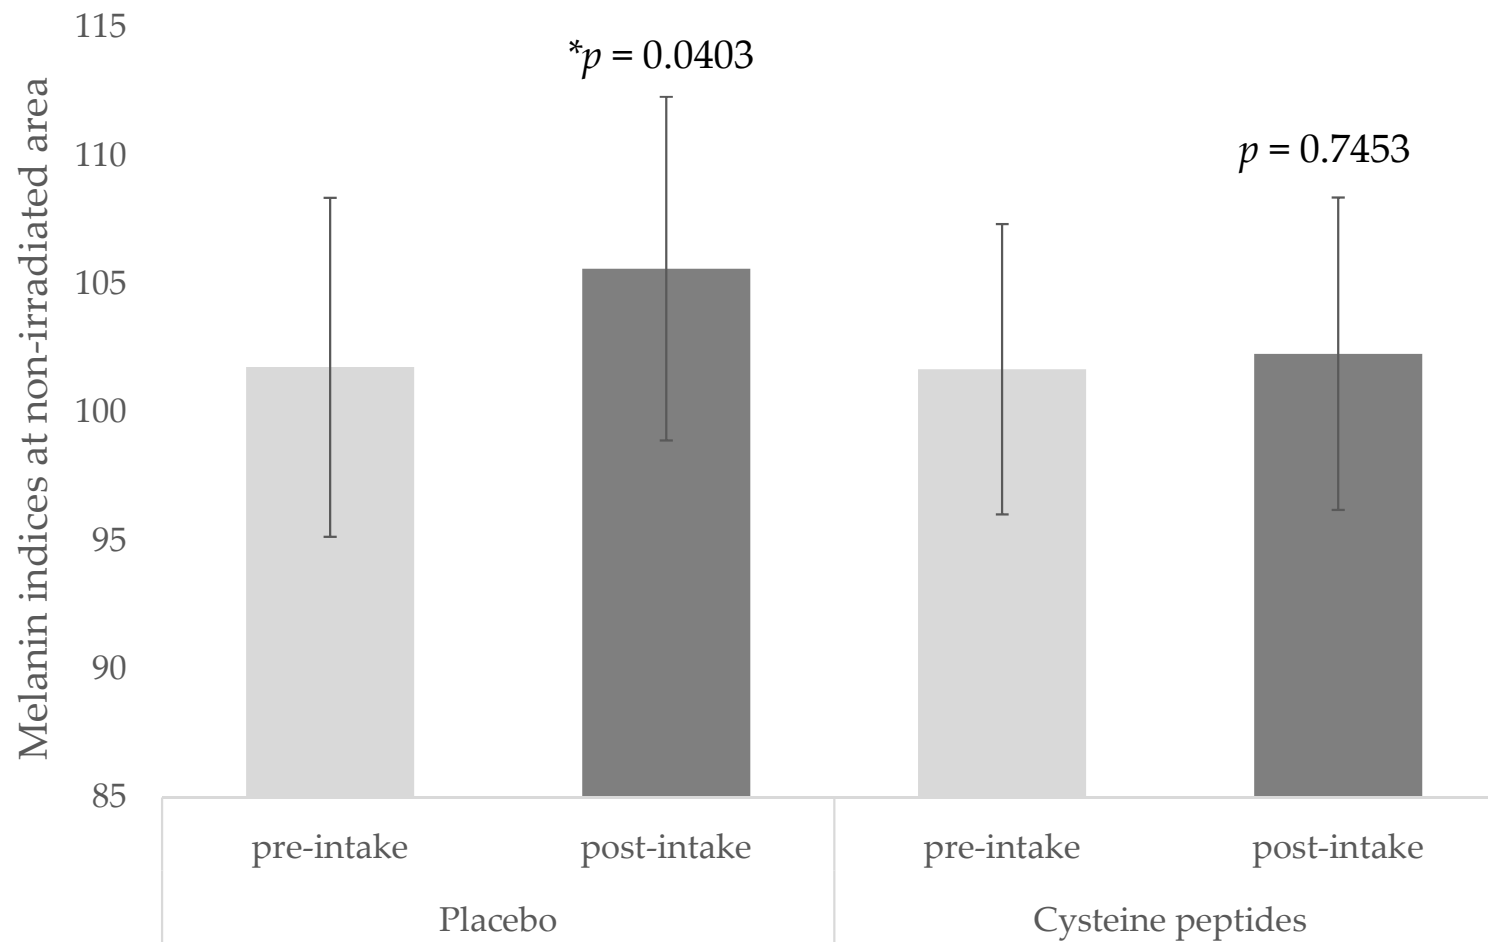

**Figure S4.** Changes in melanin indices at the non-irradiated area over 5 weeks in the cysteine peptides group was not significantly different although that in the placebo group significantly increased ( $*p = 0.0403$  by Student's paired t-test). \*,  $p < 0.05$ ; \*\*,  $p < 0.01$ ; \*\*\*,  $p < 0.001$  by unpaired t- test. Error bars indicate the standard errors.

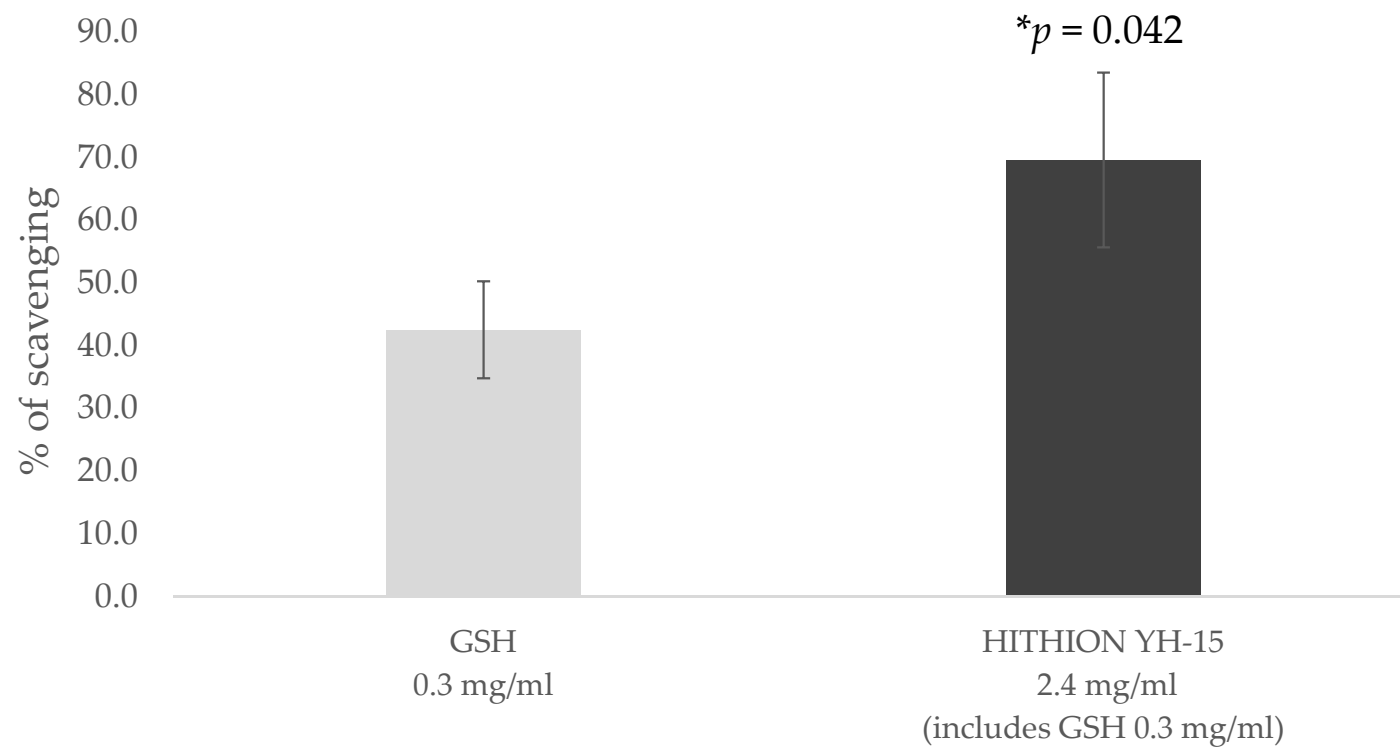

**Figure S5.** 1,1-diphenyl-2-picrylhydrazil (DPPH) radical scavenging activity (%) of GSH and HITHION YH-15. Radical scavenging activity in HITHION YH-15 (2.4 mg/ml including 0.3 mg GSH) showed the approximately 1.6 times higher than that in GSH (0.3 mg/ml).

\*,  $p < 0.05$ ; \*\*,  $p < 0.01$ ; \*\*\*,  $p < 0.001$  by unpaired t- test. Error bars indicate the standard deviations.
